# Supplementary material
Source: MDPI journal article supplement (https://www.mdpi.com/2624-8611/3/1/4)
Supplement: s1 [file s1]

# Adaptation and Validation of a Short Acculturation Scale in a Multi-Ethnic Asian Population

Su Hyun Park <sup>1,\*</sup>, Edimansyah Abidin <sup>2</sup>, Luo Nan <sup>1</sup>, Mythily Subramaniam <sup>1,2</sup>, Linda Wei Lin Tan <sup>1</sup> and Rob M van Dam <sup>1,3,\*</sup>

**Table S1.** The adapted Singaporean version of Short Acculturation Scale (SAS) for Hispanic.

| Subscales    | Items                                                                                      | Response                                                               |
|--------------|--------------------------------------------------------------------------------------------|------------------------------------------------------------------------|
| Language use | 1. In what language(s) do you think?                                                       |                                                                        |
|              | 1) How often do you think in your mother tongue (non-English)?<br>(reverse-coded)          | 1. Always; 2. Often; 3. Sometimes; 4. Rarely; 5. Never (reverse-coded) |
|              | 2) How often do you think in your Other Asian languages?                                   | 1. Never; 2. Rarely; 3. Sometimes; 4. Often; 5. Always                 |
|              | 3) How often do you think in English?                                                      | Always                                                                 |
|              | 2. In general, what language(s) do you read and speak?                                     |                                                                        |
|              | 1) How often do you read and speak in your mother tongue (non-English)?<br>(reverse-coded) | 1. Always; 2. Often; 3. Sometimes; 4. Rarely; 5. Never (reverse-coded) |
|              | 2) How often do you read and speak in your Other Asian languages?                          | 1. Never; 2. Rarely; 3. Sometimes; 4. Often; 5. Always                 |
|              | 3) How often do you read and speak in English?                                             | Always                                                                 |

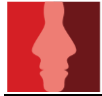

---

3. What was the language(s) you used as a child?

1) When you were a child, how often you used in your mother tongue (non-English)? (reverse-coded) 1. Always; 2. Often; 3. Sometimes; 4. Rarely; 5. Never (reverse-coded)

2) When you were a child, how often you used in your Other Asian languages? 1. Never; 2. Rarely; 3. Sometimes; 4. Often; 5. Always

3) When you were a child, how often you used in English?

---

4. What language(s) do you usually speak at home?

1) How often do you speak at home in your mother tongue (non-English)? (reverse-coded) 1. Always; 2. Often; 3. Sometimes; 4. Rarely; 5. Never (reverse-coded)

2) How often do you speak at home in your Other Asian languages? 1. Never; 2. Rarely; 3. Sometimes; 4. Often; 5. Always

3) How often do you speak at home in English?

---

5. What language(s) do you usually speak with your friends?

1) When you speak with your friends, how often you used your mother tongue (non-English)? (reverse-coded) 1. Always; 2. Often; 3. Sometimes; 4. Rarely; 5. Never (reverse-coded)

2) When you speak with your friends, how often you used your Other Asian languages? 1. Never; 2. Rarely; 3. Sometimes; 4. Often; 5. Always

---



---

|           |                                                                                                       |                                                                        |
|-----------|-------------------------------------------------------------------------------------------------------|------------------------------------------------------------------------|
|           | 3) When you speak with your friends, how often you used English?                                      |                                                                        |
| Media use | 6. In what language(s) are the TV programs you usually watch?                                         |                                                                        |
|           | 1) How often do you watch TV programs in your mother tongue (non-English)? (reverse-coded)            | 1. Always; 2. Often; 3. Sometimes; 4. Rarely; 5. Never (reverse-coded) |
|           | 2) How often do you watch TV programs in your Other Asian languages?                                  | 1. Never; 2. Rarely; 3. Sometimes; 4. Often; 5. Always                 |
|           | 3) How often do you watch TV programs in English?                                                     |                                                                        |
|           | 7. In what language(s) are the newspapers or magazines you usually read?                              |                                                                        |
|           | 1) How often do you read newspapers or magazines in your mother tongue (non-English)? (reverse-coded) | 1. Always; 2. Often; 3. Sometimes; 4. Rarely; 5. Never (reverse-coded) |
|           | 2) How often do you read newspapers or magazines in your Other Asian languages?                       | 1. Never; 2. Rarely; 3. Sometimes; 4. Often; 5. Always                 |
|           | 3) How often do you read newspapers or magazines in English?                                          |                                                                        |
|           | 8. In general, in what language(s) are the movies you prefer to watch and listen to?                  |                                                                        |
|           | 1) How often do you watch movies in your mother tongue (non-English)?                                 | 1. Always; 2. Often; 3. Sometimes; 4. Rarely; 5. Never (reverse-coded) |

---



---

|                               |                                                                        |                                                                                                                                                                                         |
|-------------------------------|------------------------------------------------------------------------|-----------------------------------------------------------------------------------------------------------------------------------------------------------------------------------------|
|                               | (reverse-coded)                                                        |                                                                                                                                                                                         |
|                               | 2) How often do you watch movies in your Other Asian languages?        | 1. Never; 2. Rarely; 3. Sometimes; 4. Often; 5. Always                                                                                                                                  |
|                               | 3) How often do you watch movies in English?                           |                                                                                                                                                                                         |
| Ethnic<br>social<br>relations | 9. Your close friends are?                                             |                                                                                                                                                                                         |
|                               | 10. You prefer going to social gatherings/parties at which people are? | 1. All from your ethnicity; 2. More from your ethnicity; 3. About half from your ethnicity and half from other ethnicity; 4. More from other ethnicities; 5. All from other ethnicities |
|                               | 11. The persons you visit or who visit you are?                        |                                                                                                                                                                                         |
|                               |                                                                        |                                                                                                                                                                                         |

---

**Table S2.** Score comparison between ethnic Chinese from Malaysia and ethnic Chinese from China.

|                            | Ethnic Chinese<br>(N = 2496) | Ethnic Chinese from<br>Malaysia (n = 1722) | Ethnic Chinese from<br>China (n = 774) | <i>p</i> -<br>value <sub>a</sub> |
|----------------------------|------------------------------|--------------------------------------------|----------------------------------------|----------------------------------|
| Overall<br>summary score   | 62.22<br>(17.35)             | 66.51 (16.96)                              | 52.68 (14.11)                          | <0.00<br>1                       |
| Language use               | 34.36<br>(10.28)             | 36.98 (9.91)                               | 28.55 (8.54)                           | <0.00<br>1                       |
| Media use                  | 22.76<br>(7.20)              | 24.28 (7.14)                               | 19.37 (6.08)                           | <0.00<br>1                       |
| Ethnic social<br>relations | 5.10 (2.00)                  | 5.25 (2.12)                                | 4.76 (1.66)                            | <0.00<br>1                       |

<sup>a</sup>Mann-Whitney U test.

**Figure S3.** Confirmatory factor analyses of the short acculturation scale. A: uni-factor, B:2-factor C:bi-factor .

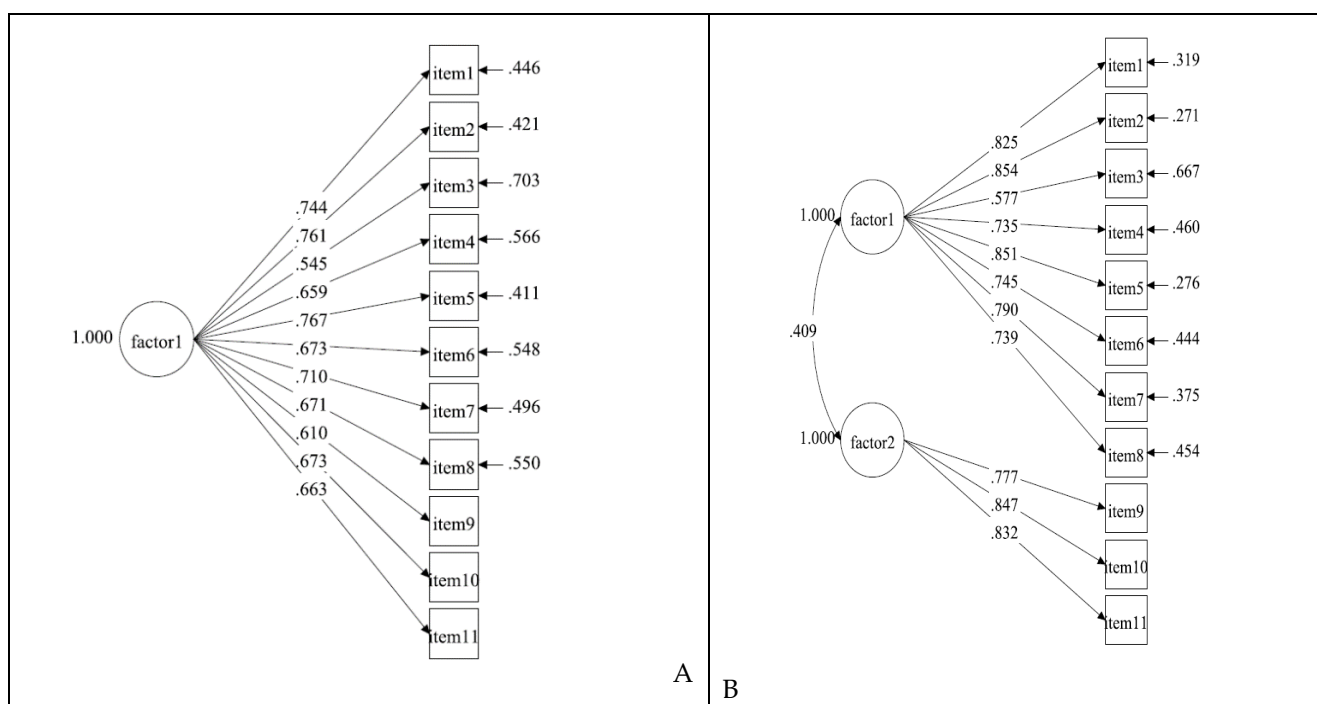

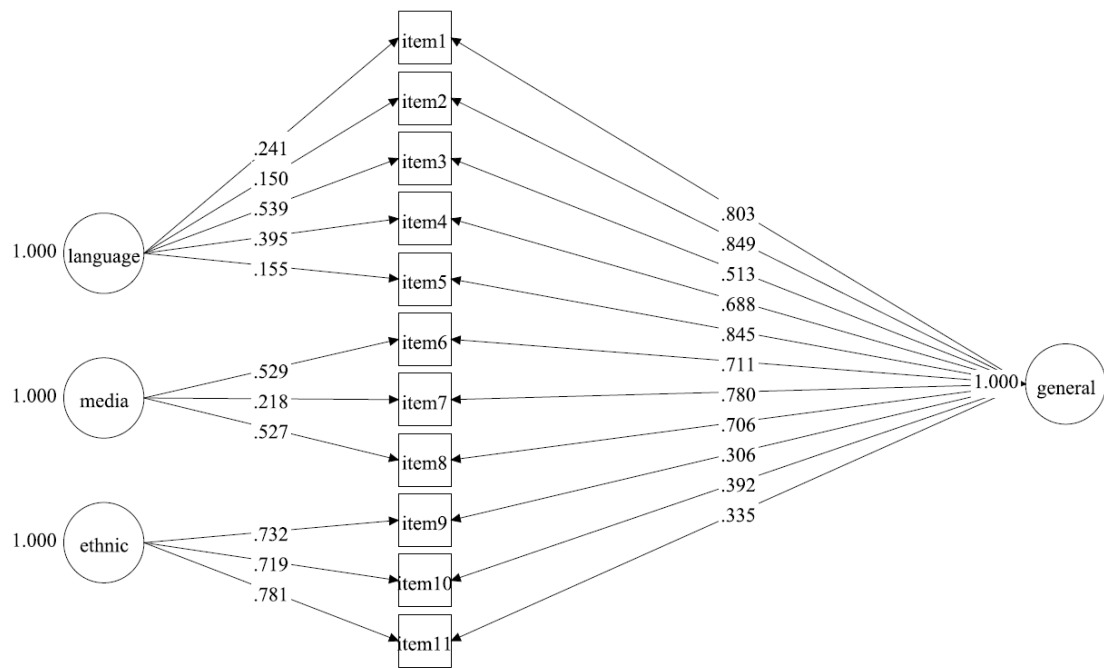

C
